# Supplementary material for: Mechano-induced luminescent and chiroptical switching in chiral cyclometalated platinum(ii) complexes
Source: Royal Society of Chemistry journal article supplement (doi:10.1039/c4tc02800g), 2015-01-01
Supplement: c4tc02800g1.pdf [file c4tc02800g1.pdf]

## Supporting Information

### **Mechano-induced Luminescent and Chiroptical Switching in Chiral Cyclometalated Platinum(II) Complexes**

Xiao-Peng Zhang, Jin-Feng Mei, Jian-Cheng Lai, Cheng-Hui Li,\* Xiao-Zeng You\*

*\*State Key laboratory of Coordination Chemistry, School of Chemistry and Chemical Engineering, Collaborative Innovation Center of Advanced Microstructures, Nanjing University, Nanjing , 210093, People's Republic of China. E-mail:chli@nju.edu.cn (C. -H. Li); youxz@nju.edu.cn (X.-Z. You.)*

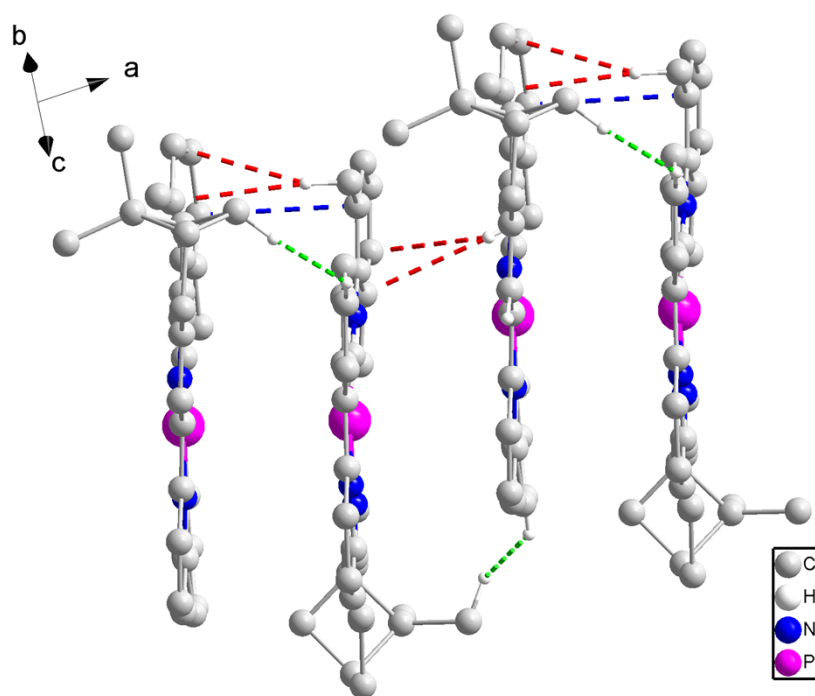

**Fig. S1** The packing diagram of (-)-1-Form-Y along *a*-axis with blue dashed lines indicating the  $\pi$ - $\pi$  interaction, red dashed lines indicating the C-H... $\pi$  interaction and green dashed lines indicating the C-H...H-C interaction. The H-atoms not involved in C-H... $\pi$  and C-H...H-C interactions are omitted for clarity.

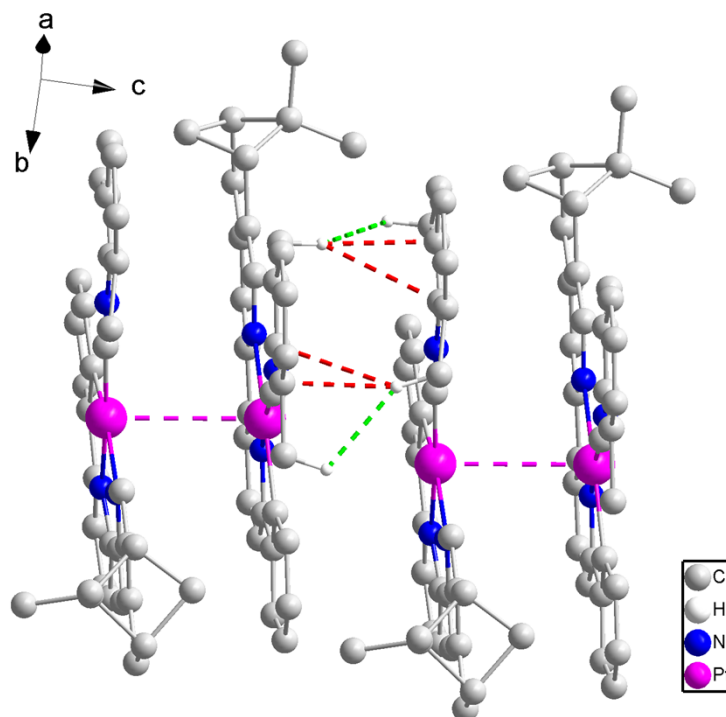

**Fig. S2** The packing diagram of **(-)-1-Form-R** along *c*-axis with red dashed lines indicating the C–H $\cdots$  $\pi$  interaction, magenta dashed lines indicating the Pt $\cdots$ Pt interaction and green dashed lines indicating the C–H $\cdots$ H–C interaction. The H-atoms not involved in C–H $\cdots$  $\pi$  and C–H $\cdots$ H–C interactions are omitted for clarity.

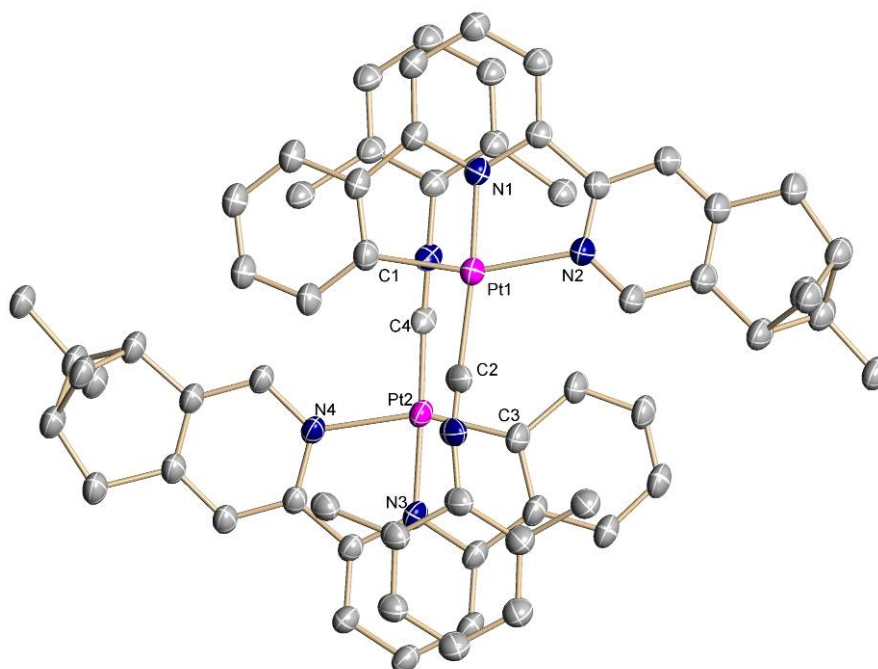

**Fig. S3** ORTEP plot of **(-)-2**. The thermal ellipsoids are drawn at 30% probability (Hydrogen atoms, solvent molecules and anions are omitted for clarity).

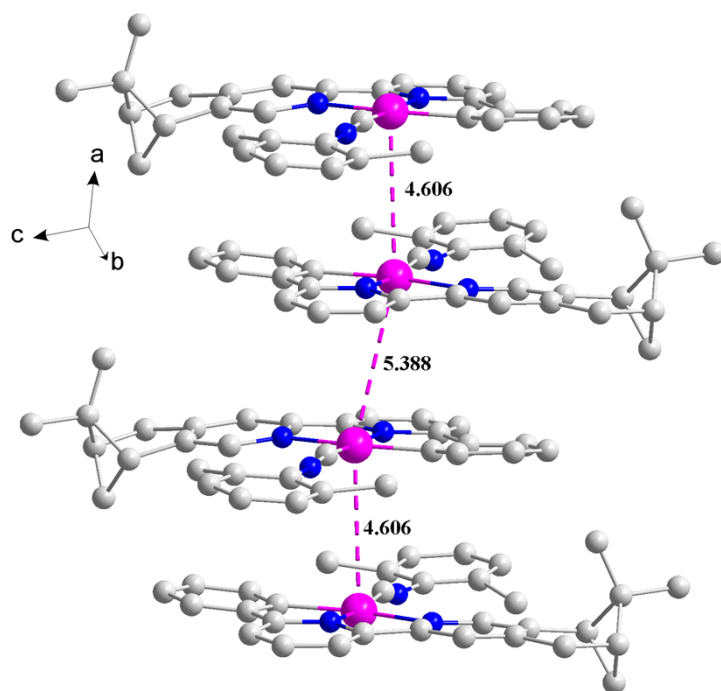

**Fig. S4** Crystal packing diagram of (-)-2 depicting the Pt...Pt distances.

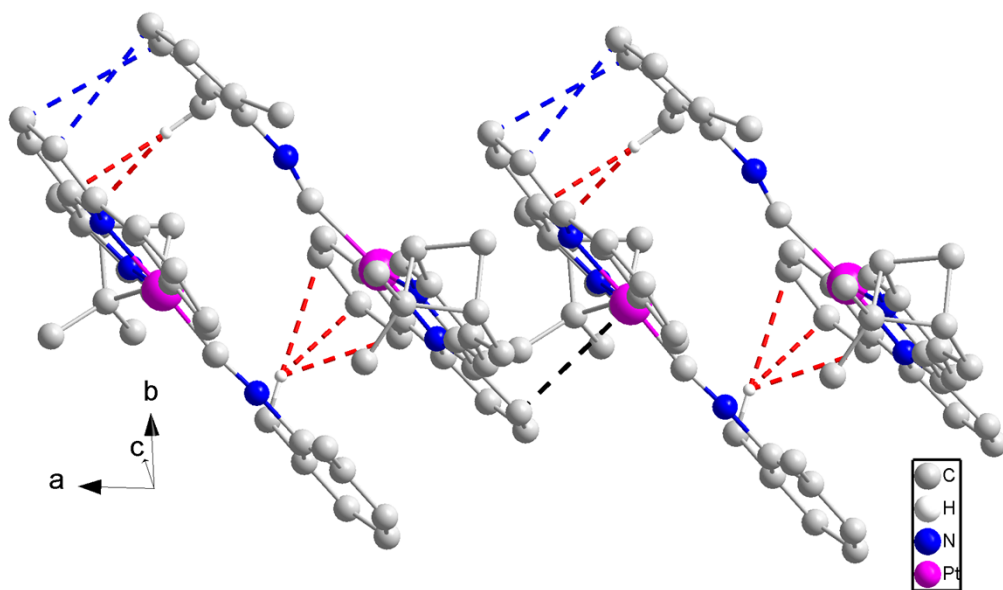

**Fig. S5** The packing diagram of (-)-2 along *a*-axis with blue dashed lines indicating the  $\pi$ - $\pi$  interaction, black dashed lines indicating the Pt- $\pi$  interaction and red dashed lines indicating the C-H... $\pi$  interaction. The H-atoms not involved in C-H... $\pi$  and C-H...H-C interactions are omitted for clarity.

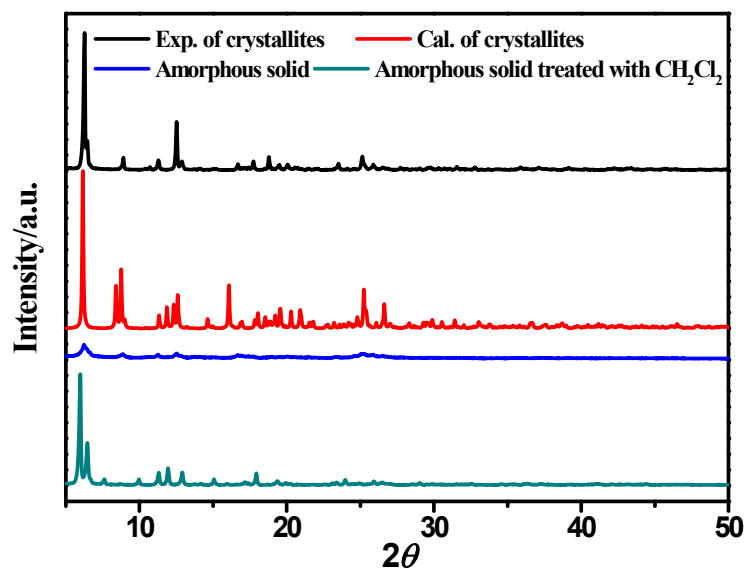

**Fig. S6** Simulated and experimental XRD patterns of (-)-2 as well as in the reversible mechanochromic process (Amorphous solid: crystallites after grinding for tens of seconds).

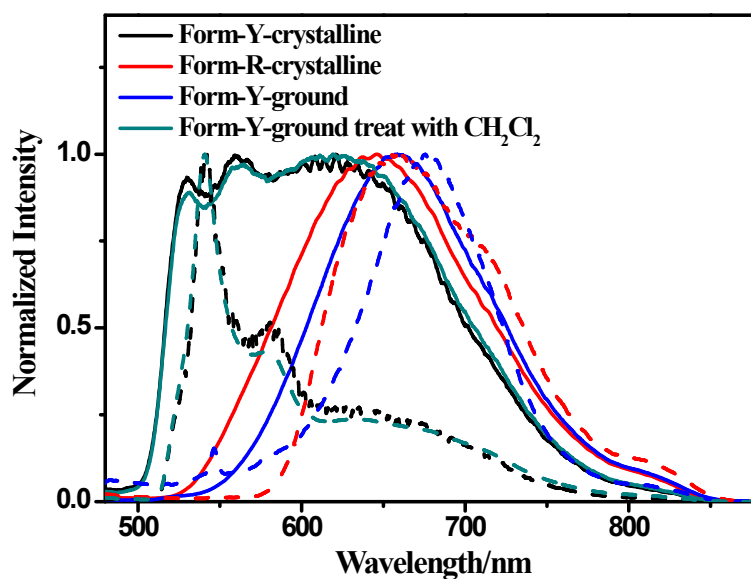

**Fig. S7** Emission spectra of (+)-1 with different solid-state forms as well as in the reversible mechanochromic process at room temperature (solid line) and 77 K (dash line) (Amorphous solid: crystallites of **Form-Y** after grinding for tens of seconds;  $\lambda_{\text{ex}} = 450 \text{ nm}$ ).

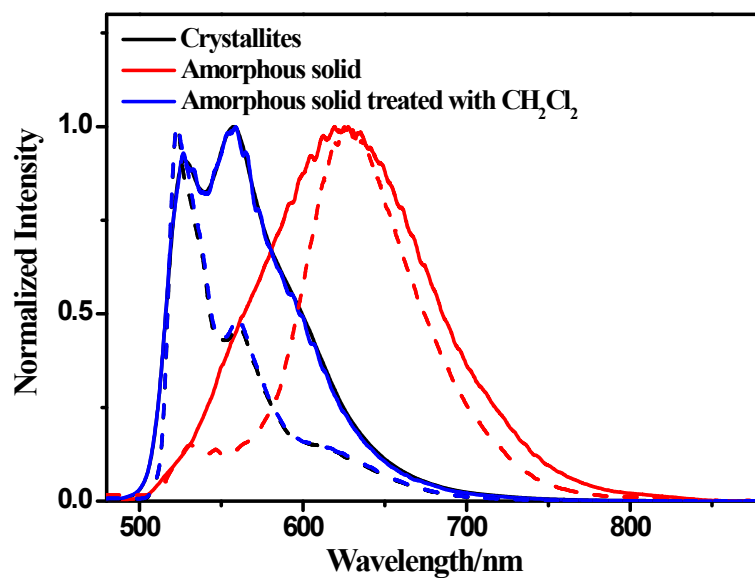

**Fig. S8** Emission spectra of green-yellow crystals of (+)-**2** as well as in the reversible mechanochromic process at room temperature (solid line) and 77 K (dash line) (Amorphous solid: crystallites of (+)-**2** after grinding for tens of seconds;  $\lambda_{\text{ex}} = 450$  nm)

**Table S1** Crystallographic data of (–)-**1-Form-R** and (–)-**2**.

|                                                                              | (–)- <b>1-Form-R</b>                                                                          | (–)- <b>2</b>                                                                                               |
|------------------------------------------------------------------------------|-----------------------------------------------------------------------------------------------|-------------------------------------------------------------------------------------------------------------|
| Formula                                                                      | C <sub>68</sub> H <sub>82</sub> Cl <sub>2</sub> N <sub>6</sub> O <sub>7</sub> Pt <sub>2</sub> | C <sub>66</sub> H <sub>59</sub> F <sub>6</sub> N <sub>6</sub> O <sub>6</sub> S <sub>2</sub> Pt <sub>2</sub> |
| <i>Mr</i> /g mol <sup>-1</sup>                                               | 1556.48                                                                                       | 1600.49                                                                                                     |
| crystal system                                                               | Trigonal                                                                                      | Triclinic                                                                                                   |
| Space group                                                                  | <i>P</i> 3 <sub>1</sub> 21                                                                    | <i>P</i> 1                                                                                                  |
| <i>a</i> /Å                                                                  | 31.521(3)                                                                                     | 9.895(2)                                                                                                    |
| <i>b</i> /Å                                                                  | 31.521(3)                                                                                     | 11.075(2)                                                                                                   |
| <i>c</i> /Å                                                                  | 7.118(2)                                                                                      | 15.169(3)                                                                                                   |
| <i>α</i> /°                                                                  | 90.00                                                                                         | 71.726(3)                                                                                                   |
| <i>β</i> /°                                                                  | 90.00                                                                                         | 83.896(4)                                                                                                   |
| <i>γ</i> /°                                                                  | 120                                                                                           | 85.526(4)                                                                                                   |
| <i>V</i> /Å <sup>3</sup>                                                     | 6124.8(19)                                                                                    | 1567.8(6)                                                                                                   |
| <i>Z</i>                                                                     | 3                                                                                             | 1                                                                                                           |
| <i>T</i> /K                                                                  | 291(2)                                                                                        | 296(2)                                                                                                      |
| Radiation, <i>λ</i> /Å                                                       | 0.71073                                                                                       | 0.71073                                                                                                     |
| <i>D</i> <sub>calcd</sub> , g/cm <sup>-3</sup>                               | 1.266                                                                                         | 1.695                                                                                                       |
| <i>μ</i> /mm <sup>-1</sup>                                                   | 3.533                                                                                         | 4.598                                                                                                       |
| <i>F</i> (000)                                                               | 2334                                                                                          | 787                                                                                                         |
| Crystal size/mm <sup>3</sup>                                                 | 0.28×0.24×0.22                                                                                | 0.28×0.20×0.13                                                                                              |
| <i>θ</i> range/°                                                             | 0.75 to 27.50                                                                                 | 1.42 to 26.00                                                                                               |
| Reflections measured                                                         | 56494                                                                                         | 9516                                                                                                        |
| Unique reflections                                                           | 9397                                                                                          | 7612                                                                                                        |
| <i>R</i> <sub>int</sub>                                                      | 0.0785                                                                                        | 0.0337                                                                                                      |
| Reflections with <i>F</i> <sup>2</sup> > 2σ( <i>F</i> <sup>2</sup> )         | 7499                                                                                          | 6437                                                                                                        |
| Number of parameters                                                         | 459                                                                                           | 729                                                                                                         |
| Goodness-of-fit on <i>F</i> <sup>2</sup>                                     | 1.048                                                                                         | 1.054                                                                                                       |
| <i>R</i> <sub>1</sub> [ <i>F</i> <sup>2</sup> > 2σ( <i>F</i> <sup>2</sup> )] | 0.0632                                                                                        | 0.0645                                                                                                      |
| w <i>R</i> <sub>2</sub> (all data)                                           | 0.1741                                                                                        | 0.1734                                                                                                      |
| Δ <i>ρ</i> <sub>max</sub> , Δ <i>ρ</i> <sub>min</sub> /e Å <sup>-3</sup>     | 6.945, -6.043                                                                                 | 2.208, -1.487                                                                                               |

**Table S2** Structural parameters of both solid-state forms of complexes (–)-**1** as well as yellow crystals of (–)-**2** determined by X-ray single crystal diffraction.

| Bond Length | (–)- <b>1-Form-Y</b> | (–)- <b>1-Form-R</b> | (–)- <b>2</b> |
|-------------|----------------------|----------------------|---------------|
| Pt1–C1      | 2.018(15)            | 1.861(12)            | 2.081(6)      |
| Pt1–C2      | 1.87(3)              | 2.088(11)            | 2.076(17)     |
| Pt1–N1      | 1.915(15)            | 1.884(9)             | 1.929(8)      |
| Pt1–N2      | 2.12(3)              | 2.135(9)             | 2.163(12)     |
| Pt2–C3      | 2.016(10)            |                      | 1.933(13)     |
| Pt2–C4      | 1.86(3)              |                      | 1.800(15)     |
| Pt2–N3      | 1.923(9)             |                      | 1.957(8)      |
| Pt1–N4      | 2.106(8)             |                      | 2.099(7)      |
| Bond Angles | (–)- <b>1-Form-Y</b> | (–)- <b>1-Form-R</b> | (–)- <b>2</b> |
| C1–Pt1–C2   | 97.7(13)             | 92.9(5)              | 91.5(5)       |
| C1–Pt1–N1   | 81.5(9)              | 175.3(4)             | 83.6(3)       |
| C1–Pt1–N2   | 160.1(10)            | 104.7(4)             | 161.0(4)      |
| C2–Pt1–N1   | 177.6(12)            | 83.3(4)              | 173.0(5)      |
| C2–Pt1–N2   | 102.1(15)            | 162.3(4)             | 107.5(5)      |
| N1–Pt1–N2   | 78.7(10)             | 79.0(4)              | 77.5(4)       |
| C3–Pt2–C4   | 96.6(14)             |                      | 102.8(7)      |
| C3–Pt2–N3   | 81.9(5)              |                      | 78.9(6)       |
| C3–Pt2–N4   | 161.2(5)             |                      | 157.2(6)      |
| C4–Pt2–N3   | 178.2(13)            |                      | 177.4(5)      |
| C4–Pt2–N4   | 102.1(14)            |                      | 100.0(5)      |
| N3–Pt2–N4   | 79.4(3)              |                      | 78.4(3)       |
